# Supplementary material for: Effect of steric hindrance and number of substituents on the transfer and interface properties of Y-shaped hole-transporting materials for perovskite solar cells
Source: Royal Society of Chemistry journal article supplement (doi:10.1039/d3cp03322h), 2023-01-01
Supplement: d3cp03322h1.pdf [file d3cp03322h1.pdf]

# **Effect of steric hindrance and number of substituents on transfer and interface properties of Y-shaped hole-transporting materials for perovskite solar cells**

Zemin Zhang<sup>\*a, b</sup>, Zetian Tang<sup>c</sup>, Keliang Wang<sup>\*a</sup>, Ping Wang<sup>a</sup>, Jianfa Yang<sup>a</sup>

<sup>a</sup> *School of Chemistry and Materials Engineering, Liupanshui Normal University, Liupanshui, 553004, China*

<sup>b</sup> *Key Laboratory of Luminescence and Real-Time Analytical Chemistry (Southwest University), Ministry of Education, College of Chemistry and Chemical Engineering, Southwest University, Chongqing 400715, China*

<sup>c</sup> *School of Physics and Electrical Engineering, Liupanshui Normal University, Liupanshui, 553004, China*

---

\*Corresponding author.

E-mail address: [2550424409@qq.com](mailto:2550424409@qq.com) (Zemin Zhang), [gs.klwang21@gzu.edu.cn](mailto:gs.klwang21@gzu.edu.cn) (Keliang Wang)

Table S1 The HOMO and LUMO energies (eV) of Z34 obtained by different theoretical levels in THF solution.

| Z34               | HOMO (eV)    | LUMO (eV)    |
|-------------------|--------------|--------------|
| Exp. <sup>a</sup> | <b>-5.14</b> | -2.43        |
| B3LYP/6-31G**     | <b>-4.45</b> | -1.46        |
| M06/6-31G**       | <b>-4.77</b> | -1.35        |
| BMK/6-31G**       | <b>-5.10</b> | -0.85        |
| PBE0/6-31G**      | <b>-4.68</b> | -1.41        |
| O3LYP/6-31G**     | 4.15         | <b>-1.65</b> |
| PW91/6-31G**      | -3.88        | <b>-2.15</b> |
| PW91/6-311G**     | -4.12        | <b>-2.40</b> |

<sup>a</sup> from reference [12]

Table S2 Computed maximum absorption wavelengths ( $\lambda_{\max}$  (nm), excited energy (eV) and oscillator strengths ( $f$ )

of  $S_0 \rightarrow S_1$  for the Z34 in THF.

| Z34               | $\lambda_{\max}$ (nm) | excited energy (eV) | oscillator strengths ( $f$ ) |
|-------------------|-----------------------|---------------------|------------------------------|
| Exp. <sup>a</sup> | 418                   | -                   | -                            |
| CAM-B3LYP/6-31G** | 388.8                 | 3.1889              | 2.7603                       |
| B3LYP/6-31G**     | 482.56                | 2.5693              | 2.1737                       |
| M06/6-31G**       | 459.04                | 2.7009              | 2.3459                       |
| BMK/6-31G**       | 413.08                | 3.0014              | 2.6393                       |
| PBE0/6-31G**      | 461.47                | 2.6867              | 2.333                        |

<sup>a</sup> from reference [12]

Table S3 Computed maximum absorption wavelengths ( $\lambda_{\max}$  (nm), excited energy (eV) and oscillator strengths ( $f$ )

of  $S_0 \rightarrow S_1$  for all molecules at BMK/6-31G\*\* method in toluene.

| molecules | $\lambda_{\max}$ (nm) | excited energy (eV) | oscillator strengths ( $f$ ) |
|-----------|-----------------------|---------------------|------------------------------|
| Z34       | 413.08                | 3.0014              | 2.6393                       |
| ZT1       | 400.36                | 3.0969              | 2.5443                       |
| ZT2       | 412.29                | 3.0072              | 2.6835                       |
| ZT3       | 400.09                | 3.0989              | 2.7605                       |
| ZT4       | 408.39                | 3.0359              | 2.6400                       |

Table S4 The molecular orbital contribution to hole and electron distribution of Z34, ZT1, ZT2, ZT3 and ZT4.

| Molecules | Excitation                     | Orbital contribution to hole |         | Orbital contribution to electron |         |
|-----------|--------------------------------|------------------------------|---------|----------------------------------|---------|
| Z34       | S <sub>0</sub> -S <sub>1</sub> | HOMO                         | 73.300% | LUMO                             | 75.302% |
|           |                                | HOMO-1                       | 15.891% | LUMO+1                           | 17.703  |
|           | S <sub>0</sub> -S <sub>2</sub> | HOMO                         | 54.346% | LUMO                             | 54.990% |
|           |                                | HOMO-1                       | 35.087% | LUMO+1                           | 34.335% |
| ZT1       | S <sub>0</sub> -S <sub>1</sub> | HOMO                         | 64.892% | LUMO                             | 70.120% |
|           |                                | HOMO-1                       | 20.804% | LUMO+1                           | 21.396% |
|           | S <sub>0</sub> -S <sub>2</sub> | HOMO                         | 53.467% | LUMO                             | 32.857% |
|           |                                | HOMO-1                       | 32.659% | LUMO+1                           | 55.246% |
| ZT2       | S <sub>0</sub> -S <sub>1</sub> | HOMO                         | 76.247% | LUMO                             | 76.091% |
|           |                                | HOMO-1                       | 14.406% | LUMO+1                           | 16.219% |
|           | S <sub>0</sub> -S <sub>2</sub> | HOMO                         | 55.942% | LUMO                             | 31.673% |
|           |                                | HOMO-1                       | 32.260% | LUMO+1                           | 56.914% |
| ZT3       | S <sub>0</sub> -S <sub>1</sub> | HOMO                         | 69.766% | LUMO                             | 71.975% |
|           |                                | HOMO-1                       | 18.517% | LUMO+1                           | 19.450% |
|           | S <sub>0</sub> -S <sub>2</sub> | HOMO                         | 57.537% | LUMO                             | 29.154% |
|           |                                | HOMO-1                       | 29.297% | LUMO+1                           | 57.830% |
| ZT4       | S <sub>0</sub> -S <sub>1</sub> | HOMO                         | 78.356% | LUMO                             | 76.965% |
|           |                                | HOMO-1                       | 13.302% | LUMO+1                           | 14.857% |
|           | S <sub>0</sub> -S <sub>2</sub> | HOMO                         | 58.212% | LUMO                             | 28.790  |
|           |                                | HOMO-1                       | 29.616% | LUMO+1                           | 59.711  |

Table S5 Calculated Lattice parameters (Å) with the lowest total energies for the investigated molecules.

| Molecules | Lattice parameters (Å)                    |                                                                  |
|-----------|-------------------------------------------|------------------------------------------------------------------|
| Z34       | Cubic 7.994×18.376×24.260 Å <sup>3</sup>  | $\alpha=114.686^\circ, \beta=91.692^\circ, \gamma=121.485^\circ$ |
| ZT1       | Cubic 22.246×10.348×15.121 Å <sup>3</sup> | $\alpha=106.694^\circ, \beta=115.972^\circ, \gamma=92.757^\circ$ |
| ZT2       | Cubic 35.147×9.226×11.129 Å <sup>3</sup>  | $\alpha=90.000^\circ, \beta=107.109^\circ, \gamma=90.000^\circ$  |
| ZT3       | Cubic 9.815×21.359×23.516 Å <sup>3</sup>  | $\alpha=90.000^\circ, \beta=127.166^\circ, \gamma=90.000^\circ$  |
| ZT4       | Cubic 41.477×8.940×12.135 Å <sup>3</sup>  | $\alpha=90.000^\circ, \beta=91.257^\circ, \gamma=90.000^\circ$   |

Table S6 Contribution of each non-hydrogen atom to hole and electron of Z34.

| atom  | S <sub>0</sub> -S <sub>1</sub> |          |         | S <sub>0</sub> -S <sub>2</sub> |       |          |         |
|-------|--------------------------------|----------|---------|--------------------------------|-------|----------|---------|
|       | hole                           | electron | Overlap | atom                           | hole  | electron | Overlap |
| 1(C)  | 1.61%                          | 3.78%    | 2.47%   | 1(C)                           | 1.08% | 2.97%    | 1.79%   |
| 2(C)  | 2.40%                          | 0.87%    | 1.45%   | 2(C)                           | 1.18% | 0.11%    | 0.36%   |
| 3(C)  | 3.30%                          | 6.97%    | 4.79%   | 3(C)                           | 1.85% | 3.14%    | 2.41%   |
| 4(C)  | 2.81%                          | 2.18%    | 2.47%   | 4(C)                           | 1.24% | 0.73%    | 0.95%   |
| 5(C)  | 1.62%                          | 2.25%    | 1.91%   | 5(C)                           | 1.28% | 1.26%    | 1.27%   |
| 6(C)  | 4.60%                          | 4.81%    | 4.71%   | 6(C)                           | 2.24% | 1.88%    | 2.05%   |
| 7(N)  | 10.91%                         | 0.59%    | 2.53%   | 7(N)                           | 5.47% | 0.91%    | 2.24%   |
| 8(C)  | 2.87%                          | 6.62%    | 4.36%   | 8(C)                           | 2.32% | 4.27%    | 3.15%   |
| 9(C)  | 2.35%                          | 2.00%    | 2.17%   | 9(C)                           | 1.23% | 1.08%    | 1.15%   |
| 10(C) | 1.48%                          | 2.15%    | 1.79%   | 10(C)                          | 1.55% | 1.62%    | 1.58%   |
| 11(C) | 4.07%                          | 4.72%    | 4.38%   | 11(C)                          | 2.62% | 2.69%    | 2.66%   |
| 12(C) | 1.22%                          | 3.05%    | 1.93%   | 12(C)                          | 1.37% | 3.73%    | 2.26%   |
| 13(C) | 2.39%                          | 1.07%    | 1.60%   | 13(C)                          | 1.21% | 0.20%    | 0.50%   |
| 14(C) | 0.68%                          | 0.42%    | 0.53%   | 14(C)                          | 0.68% | 1.38%    | 0.97%   |
| 15(C) | 1.34%                          | 0.14%    | 0.44%   | 15(C)                          | 0.78% | 0.59%    | 0.68%   |
| 16(C) | 0.13%                          | 0.02%    | 0.05%   | 16(C)                          | 0.20% | 0.30%    | 0.24%   |
| 17(C) | 1.25%                          | 0.12%    | 0.39%   | 17(C)                          | 0.93% | 1.44%    | 1.16%   |
| 18(C) | 0.18%                          | 0.03%    | 0.07%   | 18(C)                          | 0.20% | 0.05%    | 0.10%   |
| 19(C) | 1.57%                          | 0.14%    | 0.48%   | 19(C)                          | 1.02% | 1.36%    | 1.18%   |
| 20(C) | 3.30%                          | 5.42%    | 4.23%   | 20(C)                          | 4.65% | 7.56%    | 5.93%   |

|       |       |       |       |       |       |        |       |
|-------|-------|-------|-------|-------|-------|--------|-------|
| 21(C) | 3.93% | 6.95% | 5.22% | 21(C) | 3.51% | 7.20%  | 5.03% |
| 22(C) | 2.55% | 2.10% | 2.31% | 22(C) | 4.44% | 3.58%  | 3.99% |
| 23(C) | 1.24% | 2.63% | 1.81% | 23(C) | 1.52% | 4.03%  | 2.47% |
| 24(C) | 0.99% | 0.20% | 0.44% | 24(C) | 1.95% | 0.31%  | 0.77% |
| 25(C) | 2.01% | 3.72% | 2.74% | 25(C) | 2.94% | 5.90%  | 4.17% |
| 26(C) | 1.08% | 0.65% | 0.84% | 26(C) | 2.17% | 1.44%  | 1.77% |
| 27(C) | 1.34% | 1.74% | 1.53% | 27(C) | 1.61% | 1.91%  | 1.75% |
| 28(N) | 3.19% | 0.46% | 1.21% | 28(N) | 6.56% | 0.62%  | 2.01% |
| 29(C) | 0.20% | 0.23% | 0.21% | 29(C) | 0.51% | 0.54%  | 0.53% |
| 30(C) | 0.36% | 0.10% | 0.19% | 30(C) | 0.81% | 0.15%  | 0.34% |
| 31(C) | 0.05% | 0.00% | 0.01% | 31(C) | 0.10% | 0.07%  | 0.09% |
| 32(C) | 0.32% | 0.23% | 0.27% | 32(C) | 0.76% | 0.52%  | 0.63% |
| 33(C) | 0.06% | 0.02% | 0.00% | 33(C) | 0.17% | -0.04% | 0.00% |
| 34(C) | 0.42% | 0.21% | 0.30% | 34(C) | 0.91% | 0.49%  | 0.67% |
| 35(O) | 0.15% | 0.04% | 0.07% | 35(O) | 0.32% | 0.08%  | 0.16% |
| 36(C) | 0.00% | 0.00% | 0.00% | 36(C) | 0.00% | 0.00%  | 0.00% |
| 38(C) | 0.21% | 0.26% | 0.23% | 38(C) | 0.55% | 0.61%  | 0.58% |
| 39(C) | 0.38% | 0.19% | 0.27% | 39(C) | 0.86% | 0.41%  | 0.60% |
| 40(C) | 0.05% | 0.01% | 0.02% | 40(C) | 0.11% | 0.07%  | 0.09% |
| 41(C) | 0.37% | 0.23% | 0.29% | 41(C) | 0.84% | 0.52%  | 0.66% |
| 42(C) | 0.07% | 0.02% | 0.04% | 42(C) | 0.19% | 0.08%  | 0.12% |
| 43(C) | 0.45% | 0.20% | 0.30% | 43(C) | 0.99% | 0.41%  | 0.64% |
| 44(O) | 0.16% | 0.04% | 0.08% | 44(O) | 0.35% | 0.08%  | 0.17% |
| 45(C) | 0.00% | 0.00% | 0.00% | 45(C) | 0.00% | 0.00%  | 0.00% |
| 47(C) | 4.07% | 6.73% | 5.23% | 47(C) | 3.97% | 6.60%  | 5.12% |
| 48(C) | 4.70% | 7.99% | 6.13% | 48(C) | 2.94% | 5.71%  | 4.10% |
| 49(C) | 3.21% | 2.73% | 2.96% | 49(C) | 3.91% | 3.44%  | 3.67% |
| 50(C) | 1.61% | 1.99% | 1.79% | 50(C) | 1.36% | 1.44%  | 1.40% |
| 51(C) | 1.45% | 0.94% | 1.16% | 51(C) | 1.98% | 1.57%  | 1.76% |
| 52(C) | 2.61% | 4.77% | 3.53% | 52(C) | 2.63% | 5.58%  | 3.84% |
| 53(C) | 1.26% | 0.25% | 0.56% | 53(C) | 1.79% | 0.26%  | 0.68% |
| 54(C) | 1.53% | 3.37% | 2.27% | 54(C) | 1.27% | 3.82%  | 2.21% |
| 55(N) | 4.23% | 0.54% | 1.51% | 55(N) | 6.19% | 0.52%  | 1.79% |
| 56(C) | 0.29% | 0.29% | 0.29% | 56(C) | 0.51% | 0.46%  | 0.48% |
| 57(C) | 0.62% | 0.35% | 0.46% | 57(C) | 0.90% | 0.51%  | 0.68% |
| 58(C) | 0.09% | 0.02% | 0.00% | 58(C) | 0.19% | 0.00%  | 0.03% |
| 59(C) | 0.48% | 0.28% | 0.37% | 59(C) | 0.77% | 0.41%  | 0.57% |
| 60(C) | 0.05% | 0.06% | 0.06% | 60(C) | 0.06% | 0.13%  | 0.09% |
| 61(C) | 0.53% | 0.11% | 0.24% | 61(C) | 0.86% | 0.15%  | 0.36% |
| 62(C) | 0.32% | 0.38% | 0.35% | 62(C) | 0.55% | 0.61%  | 0.58% |

|       |       |       |       |       |       |        |       |
|-------|-------|-------|-------|-------|-------|--------|-------|
| 63(C) | 0.53% | 0.21% | 0.33% | 63(C) | 0.82% | 0.19%  | 0.40% |
| 64(C) | 0.09% | 0.05% | 0.06% | 64(C) | 0.15% | 0.11%  | 0.13% |
| 65(C) | 0.54% | 0.34% | 0.43% | 65(C) | 0.87% | 0.49%  | 0.65% |
| 66(C) | 0.06% | 0.02% | 0.04% | 66(C) | 0.12% | -0.02% | 0.00% |
| 67(C) | 0.72% | 0.35% | 0.50% | 67(C) | 1.08% | 0.60%  | 0.80% |
| 68(O) | 0.21% | 0.05% | 0.11% | 68(O) | 0.35% | 0.07%  | 0.16% |
| 69(C) | 0.00% | 0.00% | 0.00% | 69(C) | 0.00% | 0.00%  | 0.00% |
| 71(O) | 0.18% | 0.04% | 0.09% | 71(O) | 0.31% | 0.06%  | 0.14% |
| 72(C) | 0.00% | 0.00% | 0.00% | 72(C) | 0.00% | 0.00%  | 0.00% |
| 74(O) | 0.40% | 0.02% | 0.09% | 74(O) | 0.45% | 0.21%  | 0.31% |
| 75(C) | 0.00% | 0.00% | 0.00% | 75(C) | 0.00% | 0.01%  | 0.00% |

Table S7 Contribution of each non-hydrogen atom to hole and electron of ZT1.

| $S_0-S_1$ |       |          |         | $S_0-S_2$ |       |          |         |
|-----------|-------|----------|---------|-----------|-------|----------|---------|
| atom      | hole  | electron | Overlap | atom      | hole  | electron | Overlap |
| 1(C)      | 1.48% | 2.96%    | 2.09%   | 1(C)      | 1.18% | 2.79%    | 1.81%   |
| 2(C)      | 1.55% | 1.03%    | 1.26%   | 2(C)      | 1.14% | 0.25%    | 0.53%   |
| 3(C)      | 2.95% | 6.01%    | 4.21%   | 3(C)      | 2.15% | 3.87%    | 2.88%   |
| 4(C)      | 1.77% | 1.74%    | 1.76%   | 4(C)      | 1.20% | 1.05%    | 1.12%   |
| 5(C)      | 1.50% | 2.30%    | 1.86%   | 5(C)      | 1.33% | 1.53%    | 1.42%   |
| 6(C)      | 3.12% | 4.55%    | 3.77%   | 6(C)      | 2.17% | 2.64%    | 2.39%   |
| 7(N)      | 8.17% | 0.54%    | 2.10%   | 7(N)      | 6.33% | 0.50%    | 1.79%   |
| 8(C)      | 3.02% | 6.19%    | 4.32%   | 8(C)      | 2.29% | 4.22%    | 3.11%   |
| 9(C)      | 1.71% | 2.04%    | 1.87%   | 9(C)      | 1.30% | 1.08%    | 1.19%   |
| 10(C)     | 1.65% | 1.94%    | 1.79%   | 10(C)     | 1.33% | 1.53%    | 1.42%   |
| 11(C)     | 3.27% | 4.57%    | 3.87%   | 11(C)     | 2.35% | 2.84%    | 2.58%   |
| 12(C)     | 1.40% | 3.41%    | 2.19%   | 12(C)     | 1.27% | 2.90%    | 1.92%   |
| 13(C)     | 1.79% | 0.84%    | 1.22%   | 13(C)     | 1.24% | 0.32%    | 0.63%   |
| 14(C)     | 0.30% | 0.40%    | 0.34%   | 14(C)     | 0.52% | 3.19%    | 1.28%   |
| 15(C)     | 1.57% | 0.19%    | 0.55%   | 15(C)     | 1.46% | 1.12%    | 1.28%   |
| 16(C)     | 0.02% | 0.01%    | 0.02%   | 16(C)     | 0.08% | 0.86%    | 0.26%   |
| 17(C)     | 1.40% | 0.10%    | 0.38%   | 17(C)     | 1.62% | 2.57%    | 2.04%   |
| 18(C)     | 0.03% | 0.01%    | 0.02%   | 18(C)     | 0.08% | 0.47%    | 0.20%   |
| 19(C)     | 1.49% | 0.17%    | 0.51%   | 19(C)     | 1.38% | 1.40%    | 1.39%   |
| 20(C)     | 4.27% | 6.07%    | 5.09%   | 20(C)     | 4.20% | 6.17%    | 5.09%   |

|       |       |       |       |       |       |       |       |
|-------|-------|-------|-------|-------|-------|-------|-------|
| 21(C) | 3.81% | 7.44% | 5.32% | 21(C) | 2.98% | 6.38% | 4.36% |
| 22(C) | 3.51% | 2.49% | 2.96% | 22(C) | 4.10% | 2.92% | 3.46% |
| 23(C) | 1.37% | 3.03% | 2.04% | 23(C) | 1.27% | 3.25% | 2.03% |
| 24(C) | 1.47% | 0.26% | 0.62% | 24(C) | 1.83% | 0.29% | 0.73% |
| 25(C) | 2.50% | 4.45% | 3.34% | 25(C) | 2.60% | 5.07% | 3.63% |
| 26(C) | 1.60% | 0.81% | 1.14% | 26(C) | 2.04% | 1.10% | 1.50% |
| 27(C) | 1.48% | 1.95% | 1.70% | 27(C) | 1.37% | 1.81% | 1.57% |
| 28(N) | 4.69% | 0.53% | 1.58% | 28(N) | 6.00% | 0.54% | 1.80% |
| 29(C) | 0.39% | 0.37% | 0.38% | 29(C) | 0.55% | 0.47% | 0.50% |
| 30(C) | 0.61% | 0.20% | 0.35% | 30(C) | 0.84% | 0.23% | 0.44% |
| 31(C) | 0.10% | 0.06% | 0.08% | 31(C) | 0.09% | 0.13% | 0.11% |
| 32(C) | 0.62% | 0.37% | 0.48% | 32(C) | 0.83% | 0.45% | 0.61% |
| 33(C) | 0.13% | 0.03% | 0.06% | 33(C) | 0.19% | 0.03% | 0.07% |
| 34(C) | 0.72% | 0.35% | 0.50% | 34(C) | 0.93% | 0.49% | 0.68% |
| 35(O) | 0.26% | 0.06% | 0.12% | 35(O) | 0.31% | 0.07% | 0.14% |
| 36(C) | 0.00% | 0.00% | 0.00% | 36(C) | 0.00% | 0.00% | 0.00% |
| 38(C) | 0.37% | 0.35% | 0.36% | 38(C) | 0.48% | 0.45% | 0.46% |
| 39(C) | 0.56% | 0.20% | 0.34% | 39(C) | 0.76% | 0.29% | 0.47% |
| 40(C) | 0.10% | 0.04% | 0.07% | 40(C) | 0.09% | 0.04% | 0.06% |
| 41(C) | 0.60% | 0.33% | 0.44% | 41(C) | 0.78% | 0.40% | 0.56% |
| 42(C) | 0.13% | 0.02% | 0.05% | 42(C) | 0.20% | 0.04% | 0.09% |
| 43(C) | 0.67% | 0.29% | 0.44% | 43(C) | 0.82% | 0.33% | 0.52% |
| 44(O) | 0.24% | 0.05% | 0.11% | 44(O) | 0.29% | 0.06% | 0.14% |
| 45(C) | 0.00% | 0.00% | 0.00% | 45(C) | 0.00% | 0.00% | 0.00% |
| 47(C) | 4.16% | 6.17% | 5.06% | 47(C) | 4.13% | 6.34% | 5.11% |
| 48(C) | 3.65% | 7.37% | 5.18% | 48(C) | 2.79% | 6.23% | 4.17% |
| 49(C) | 3.48% | 2.69% | 3.06% | 49(C) | 4.13% | 3.25% | 3.66% |
| 50(C) | 1.42% | 1.87% | 1.63% | 50(C) | 1.30% | 1.69% | 1.48% |
| 51(C) | 1.57% | 0.96% | 1.23% | 51(C) | 2.04% | 1.36% | 1.66% |
| 52(C) | 2.48% | 4.71% | 3.42% | 52(C) | 2.62% | 5.53% | 3.81% |
| 53(C) | 1.50% | 0.28% | 0.65% | 53(C) | 1.94% | 0.35% | 0.82% |
| 54(C) | 1.33% | 3.24% | 2.08% | 54(C) | 1.24% | 3.56% | 2.10% |
| 55(N) | 4.93% | 0.51% | 1.59% | 55(N) | 6.51% | 0.53% | 1.86% |
| 56(C) | 0.42% | 0.33% | 0.37% | 56(C) | 0.58% | 0.43% | 0.50% |
| 57(C) | 0.78% | 0.35% | 0.52% | 57(C) | 1.01% | 0.49% | 0.70% |
| 58(C) | 0.15% | 0.04% | 0.07% | 58(C) | 0.23% | 0.03% | 0.08% |
| 59(C) | 0.68% | 0.33% | 0.47% | 59(C) | 0.92% | 0.39% | 0.60% |
| 60(C) | 0.11% | 0.07% | 0.09% | 60(C) | 0.10% | 0.13% | 0.11% |
| 61(C) | 0.65% | 0.20% | 0.36% | 61(C) | 0.92% | 0.21% | 0.44% |
| 62(C) | 0.44% | 0.39% | 0.41% | 62(C) | 0.58% | 0.54% | 0.56% |

|        |       |        |       |        |       |        |       |
|--------|-------|--------|-------|--------|-------|--------|-------|
| 63(C)  | 0.62% | 0.19%  | 0.34% | 63(C)  | 0.81% | 0.20%  | 0.40% |
| 64(C)  | 0.12% | 0.03%  | 0.06% | 64(C)  | 0.17% | 0.06%  | 0.10% |
| 65(C)  | 0.65% | 0.35%  | 0.47% | 65(C)  | 0.88% | 0.46%  | 0.64% |
| 66(C)  | 0.09% | -0.01% | 0.00% | 66(C)  | 0.12% | -0.01% | 0.00% |
| 67(C)  | 0.85% | 0.31%  | 0.52% | 67(C)  | 1.12% | 0.47%  | 0.72% |
| 68(O)  | 0.30% | 0.06%  | 0.13% | 68(O)  | 0.37% | 0.07%  | 0.16% |
| 69(C)  | 0.00% | 0.00%  | 0.00% | 69(C)  | 0.00% | 0.00%  | 0.00% |
| 71(O)  | 0.28% | 0.05%  | 0.12% | 71(O)  | 0.37% | 0.06%  | 0.15% |
| 72(C)  | 0.00% | 0.00%  | 0.00% | 72(C)  | 0.00% | 0.00%  | 0.00% |
| 122(S) | 0.13% | 0.03%  | 0.06% | 122(S) | 0.23% | 0.38%  | 0.29% |
| 123(O) | 0.10% | 0.01%  | 0.02% | 123(O) | 0.09% | 0.04%  | 0.06% |
| 124(C) | 0.10% | 0.01%  | 0.04% | 124(C) | 0.16% | 0.30%  | 0.22% |
| 125(C) | 0.02% | 0.00%  | 0.00% | 125(C) | 0.03% | 0.05%  | 0.04% |
| 126(C) | 0.01% | 0.00%  | 0.00% | 126(C) | 0.01% | 0.02%  | 0.01% |
| 127(C) | 0.00% | 0.00%  | 0.00% | 127(C) | 0.01% | 0.01%  | 0.01% |
| 128(C) | 0.00% | 0.00%  | 0.00% | 128(C) | 0.00% | 0.00%  | 0.00% |
| 129(C) | 0.00% | 0.00%  | 0.00% | 129(C) | 0.00% | 0.00%  | 0.00% |

Table S8 Contribution of each non-hydrogen atom to hole and electron of ZT2.

| $S_0-S_1$ |        |          |         | $S_0-S_2$ |       |          |         |
|-----------|--------|----------|---------|-----------|-------|----------|---------|
| atom      | hole   | electron | Overlap | atom      | hole  | electron | Overlap |
| 1(C)      | 1.42%  | 3.60%    | 2.26%   | 1(C)      | 1.19% | 2.91%    | 1.86%   |
| 2(C)      | 2.74%  | 0.87%    | 1.54%   | 2(C)      | 1.37% | 0.13%    | 0.43%   |
| 3(C)      | 3.26%  | 6.92%    | 4.75%   | 3(C)      | 2.19% | 3.42%    | 2.74%   |
| 4(C)      | 3.07%  | 2.12%    | 2.55%   | 4(C)      | 1.53% | 0.70%    | 1.04%   |
| 5(C)      | 1.51%  | 2.17%    | 1.81%   | 5(C)      | 1.35% | 1.45%    | 1.40%   |
| 6(C)      | 5.05%  | 4.61%    | 4.83%   | 6(C)      | 2.87% | 1.88%    | 2.32%   |
| 7(N)      | 12.20% | 0.56%    | 2.62%   | 7(N)      | 6.20% | 0.98%    | 2.46%   |
| 8(C)      | 3.12%  | 6.86%    | 4.63%   | 8(C)      | 2.26% | 3.57%    | 2.84%   |
| 9(C)      | 2.77%  | 2.02%    | 2.37%   | 9(C)      | 1.44% | 0.76%    | 1.05%   |
| 10(C)     | 1.56%  | 2.32%    | 1.90%   | 10(C)     | 1.46% | 1.53%    | 1.50%   |
| 11(C)     | 4.77%  | 4.64%    | 4.70%   | 11(C)     | 2.90% | 2.05%    | 2.44%   |
| 12(C)     | 1.28%  | 3.13%    | 2.00%   | 12(C)     | 1.29% | 3.17%    | 2.02%   |
| 13(C)     | 2.71%  | 1.07%    | 1.70%   | 13(C)     | 1.34% | 0.15%    | 0.45%   |
| 14(C)     | 0.92%  | 0.37%    | 0.58%   | 14(C)     | 0.75% | 1.28%    | 0.98%   |
| 15(C)     | 1.81%  | 0.14%    | 0.51%   | 15(C)     | 1.12% | 0.99%    | 1.05%   |
| 16(C)     | 0.26%  | 0.02%    | 0.06%   | 16(C)     | 0.22% | 0.14%    | 0.18%   |
| 17(C)     | 1.46%  | 0.07%    | 0.31%   | 17(C)     | 0.99% | 1.43%    | 1.19%   |



|       |       |       |       |       |       |       |       |
|-------|-------|-------|-------|-------|-------|-------|-------|
| 18(C) | 0.20% | 0.02% | 0.07% | 18(C) | 0.20% | 0.13% | 0.17% |
| 19(C) | 1.48% | 0.12% | 0.42% | 19(C) | 0.85% | 0.91% | 0.88% |
| 20(C) | 3.15% | 5.88% | 4.30% | 20(C) | 4.02% | 7.24% | 5.39% |
| 21(C) | 4.58% | 6.85% | 5.61% | 21(C) | 3.69% | 5.89% | 4.66% |
| 22(C) | 2.13% | 2.66% | 2.38% | 22(C) | 3.50% | 4.26% | 3.86% |
| 23(C) | 1.31% | 2.60% | 1.84% | 23(C) | 1.39% | 3.37% | 2.16% |
| 24(C) | 0.79% | 0.34% | 0.52% | 24(C) | 1.55% | 0.63% | 0.98% |
| 25(C) | 2.27% | 4.13% | 3.06% | 25(C) | 2.98% | 6.14% | 4.28% |
| 26(C) | 0.83% | 0.90% | 0.87% | 26(C) | 1.63% | 1.75% | 1.69% |
| 27(C) | 1.51% | 1.94% | 1.71% | 27(C) | 1.63% | 2.08% | 1.84% |
| 28(N) | 2.88% | 0.29% | 0.91% | 28(N) | 6.18% | 0.34% | 1.46% |
| 29(C) | 0.14% | 0.54% | 0.27% | 29(C) | 0.37% | 1.29% | 0.69% |
| 30(C) | 0.63% | 0.32% | 0.45% | 30(C) | 1.36% | 0.68% | 0.96% |
| 31(C) | 0.01% | 0.09% | 0.03% | 31(C) | 0.04% | 0.23% | 0.10% |
| 32(C) | 0.55% | 0.45% | 0.50% | 32(C) | 1.35% | 1.10% | 1.22% |
| 33(C) | 0.02% | 0.11% | 0.04% | 33(C) | 0.06% | 0.33% | 0.14% |
| 34(C) | 0.53% | 0.24% | 0.36% | 34(C) | 1.22% | 0.45% | 0.74% |
| 35(S) | 0.05% | 0.06% | 0.06% | 35(S) | 0.17% | 0.15% | 0.16% |
| 36(C) | 0.22% | 0.24% | 0.23% | 36(C) | 0.52% | 0.36% | 0.43% |
| 37(C) | 0.37% | 0.09% | 0.18% | 37(C) | 0.78% | 0.14% | 0.32% |
| 38(C) | 0.03% | 0.04% | 0.03% | 38(C) | 0.08% | 0.03% | 0.05% |
| 39(C) | 0.32% | 0.18% | 0.24% | 39(C) | 0.74% | 0.19% | 0.37% |
| 40(C) | 0.07% | 0.00% | 0.01% | 40(C) | 0.18% | 0.02% | 0.05% |
| 41(C) | 0.38% | 0.19% | 0.27% | 41(C) | 0.85% | 0.23% | 0.44% |
| 42(O) | 0.11% | 0.03% | 0.05% | 42(O) | 0.29% | 0.03% | 0.09% |
| 43(C) | 3.27% | 6.32% | 4.55% | 43(C) | 3.82% | 6.78% | 5.09% |
| 44(C) | 4.82% | 7.25% | 5.91% | 44(C) | 3.57% | 5.50% | 4.43% |
| 45(C) | 2.26% | 2.74% | 2.49% | 45(C) | 3.32% | 3.95% | 3.62% |
| 46(C) | 1.53% | 2.05% | 1.77% | 46(C) | 1.50% | 1.94% | 1.71% |
| 47(C) | 0.93% | 0.83% | 0.88% | 47(C) | 1.58% | 1.52% | 1.55% |
| 48(C) | 2.35% | 4.29% | 3.18% | 48(C) | 2.83% | 5.71% | 4.02% |
| 49(C) | 0.86% | 0.40% | 0.58% | 49(C) | 1.47% | 0.60% | 0.94% |
| 50(C) | 1.40% | 2.76% | 1.97% | 50(C) | 1.36% | 3.18% | 2.08% |
| 51(N) | 3.15% | 0.32% | 1.01% | 51(N) | 5.65% | 0.34% | 1.38% |
| 52(C) | 0.15% | 0.55% | 0.29% | 52(C) | 0.32% | 1.26% | 0.63% |
| 53(C) | 0.62% | 0.31% | 0.44% | 53(C) | 1.13% | 0.55% | 0.78% |
| 54(C) | 0.02% | 0.12% | 0.05% | 54(C) | 0.05% | 0.29% | 0.12% |
| 55(C) | 0.63% | 0.46% | 0.54% | 55(C) | 1.22% | 1.05% | 1.13% |
| 56(C) | 0.02% | 0.09% | 0.04% | 56(C) | 0.03% | 0.27% | 0.09% |
| 57(C) | 0.66% | 0.30% | 0.44% | 57(C) | 1.22% | 0.54% | 0.82% |

|        |        |       |       |        |       |        |       |
|--------|--------|-------|-------|--------|-------|--------|-------|
| 58(C)  | 0.24%  | 0.21% | 0.23% | 58(C)  | 0.52% | 0.32%  | 0.41% |
| 59(C)  | 0.32%  | 0.14% | 0.21% | 59(C)  | 0.61% | 0.09%  | 0.23% |
| 60(C)  | 0.07%  | 0.01% | 0.02% | 60(C)  | 0.13% | 0.00%  | 0.00% |
| 61(C)  | 0.34%  | 0.15% | 0.23% | 61(C)  | 0.65% | 0.17%  | 0.33% |
| 62(C)  | 0.05%  | 0.02% | 0.04% | 62(C)  | 0.10% | -0.02% | 0.00% |
| 63(C)  | 0.43%  | 0.11% | 0.22% | 63(C)  | 0.83% | 0.15%  | 0.36% |
| 64(O)  | 0.12%  | 0.03% | 0.06% | 64(O)  | 0.24% | 0.03%  | 0.08% |
| 65(S)  | 0.07%  | 0.06% | 0.06% | 65(S)  | 0.17% | 0.14%  | 0.15% |
| 106(C) | 0.05%  | 0.04% | 0.04% | 106(C) | 0.11% | 0.10%  | 0.10% |
| 107(C) | 0.00%  | 0.00% | 0.00% | 107(C) | 0.01% | 0.00%  | 0.01% |
| 108(C) | 0.00%  | 0.00% | 0.00% | 108(C) | 0.00% | 0.00%  | 0.00% |
| 109(C) | 0.00%  | 0.00% | 0.00% | 109(C) | 0.00% | 0.00%  | 0.00% |
| 110(C) | 0.00%  | 0.00% | 0.00% | 110(C) | 0.00% | 0.00%  | 0.00% |
| 111(C) | 0.00%  | 0.00% | 0.00% | 111(C) | 0.00% | 0.00%  | 0.00% |
| 113(O) | 0.01%  | 0.01% | 0.01% | 113(O) | 0.12% | 0.02%  | 0.05% |
| 114(C) | 0.04%  | 0.04% | 0.04% | 114(C) | 0.11% | 0.11%  | 0.11% |
| 115(C) | 0.01%  | 0.01% | 0.01% | 115(C) | 0.03% | 0.02%  | 0.02% |
| 116(C) | 0.00%  | 0.00% | 0.00% | 116(C) | 0.01% | 0.01%  | 0.01% |
| 117(C) | 0.00%  | 0.00% | 0.00% | 117(C) | 0.00% | 0.00%  | 0.00% |
| 118(C) | 0.00%  | 0.00% | 0.00% | 118(C) | 0.00% | 0.00%  | 0.00% |
| 119(C) | 0.00%  | 0.00% | 0.00% | 119(C) | 0.00% | 0.00%  | 0.00% |
| 121(O) | -0.01% | 0.01% | 0.00% | 121(O) | 0.09% | 0.02%  | 0.04% |
| 146(C) | 0.00%  | 0.00% | 0.00% | 146(C) | 0.00% | 0.00%  | 0.00% |
| 147(O) | 0.57%  | 0.01% | 0.09% | 147(O) | 0.48% | 0.22%  | 0.33% |
| 148(C) | 0.00%  | 0.00% | 0.00% | 148(C) | 0.00% | 0.00%  | 0.00% |
| 152(C) | 0.00%  | 0.00% | 0.00% | 152(C) | 0.00% | 0.00%  | 0.00% |

Table S9 Contribution of each non-hydrogen atom to hole and electron of ZT3.

| $S_0-S_1$ |       |          |         | $S_0-S_2$ |       |          |         |
|-----------|-------|----------|---------|-----------|-------|----------|---------|
| atom      | hole  | electron | Overlap | atom      | hole  | electron | Overlap |
| 1(C)      | 1.61% | 3.38%    | 2.33%   | 1(C)      | 1.15% | 2.63%    | 1.74%   |
| 2(C)      | 1.98% | 0.93%    | 1.36%   | 2(C)      | 1.42% | 0.18%    | 0.50%   |
| 3(C)      | 3.36% | 6.61%    | 4.71%   | 3(C)      | 2.25% | 3.61%    | 2.85%   |
| 4(C)      | 2.25% | 1.99%    | 2.12%   | 4(C)      | 1.56% | 1.00%    | 1.25%   |
| 5(C)      | 1.68% | 2.34%    | 1.98%   | 5(C)      | 1.31% | 1.32%    | 1.31%   |
| 6(C)      | 4.14% | 4.70%    | 4.41%   | 6(C)      | 2.72% | 2.19%    | 2.44%   |
| 7(N)      | 9.63% | 0.55%    | 2.30%   | 7(N)      | 7.58% | 0.57%    | 2.08%   |
| 8(C)      | 3.12% | 6.06%    | 4.35%   | 8(C)      | 2.62% | 4.29%    | 3.35%   |

|       |       |        |       |       |       |        |       |
|-------|-------|--------|-------|-------|-------|--------|-------|
| 9(C)  | 2.09% | 1.85%  | 1.96% | 9(C)  | 1.62% | 1.10%  | 1.33% |
| 10(C) | 1.56% | 2.03%  | 1.78% | 10(C) | 1.46% | 1.49%  | 1.48% |
| 11(C) | 3.79% | 4.34%  | 4.06% | 11(C) | 3.01% | 2.69%  | 2.84% |
| 12(C) | 1.35% | 3.01%  | 2.02% | 12(C) | 1.37% | 3.05%  | 2.05% |
| 13(C) | 2.09% | 0.92%  | 1.39% | 13(C) | 1.52% | 0.29%  | 0.67% |
| 14(C) | 0.36% | 0.38%  | 0.37% | 14(C) | 0.61% | 3.44%  | 1.45% |
| 15(C) | 1.69% | 0.15%  | 0.50% | 15(C) | 1.60% | 1.31%  | 1.45% |
| 16(C) | 0.03% | 0.02%  | 0.03% | 16(C) | 0.09% | 0.97%  | 0.29% |
| 17(C) | 1.53% | 0.10%  | 0.39% | 17(C) | 1.73% | 2.94%  | 2.26% |
| 18(C) | 0.03% | -0.01% | 0.00% | 18(C) | 0.10% | 0.56%  | 0.23% |
| 19(C) | 1.65% | 0.15%  | 0.50% | 19(C) | 1.52% | 1.57%  | 1.54% |
| 20(C) | 3.69% | 5.67%  | 4.57% | 20(C) | 4.15% | 6.38%  | 5.15% |
| 21(C) | 4.12% | 6.64%  | 5.23% | 21(C) | 3.64% | 6.01%  | 4.68% |
| 22(C) | 2.69% | 2.61%  | 2.65% | 22(C) | 3.63% | 3.49%  | 3.56% |
| 23(C) | 1.30% | 2.57%  | 1.83% | 23(C) | 1.38% | 2.96%  | 2.02% |
| 24(C) | 1.07% | 0.34%  | 0.60% | 24(C) | 1.59% | 0.53%  | 0.92% |
| 25(C) | 2.48% | 4.19%  | 3.23% | 25(C) | 2.92% | 5.37%  | 3.96% |
| 26(C) | 1.16% | 0.88%  | 1.01% | 26(C) | 1.71% | 1.33%  | 1.51% |
| 27(C) | 1.47% | 1.90%  | 1.67% | 27(C) | 1.56% | 2.01%  | 1.77% |
| 28(N) | 3.66% | 0.31%  | 1.07% | 28(N) | 5.85% | 0.34%  | 1.40% |
| 29(C) | 0.17% | 0.64%  | 0.33% | 29(C) | 0.33% | 1.24%  | 0.64% |
| 30(C) | 0.75% | 0.27%  | 0.45% | 30(C) | 1.24% | 0.57%  | 0.84% |
| 31(C) | 0.02% | 0.15%  | 0.06% | 31(C) | 0.03% | 0.25%  | 0.09% |
| 32(C) | 0.69% | 0.56%  | 0.63% | 32(C) | 1.21% | 1.04%  | 1.12% |
| 33(C) | 0.03% | 0.05%  | 0.04% | 33(C) | 0.05% | 0.26%  | 0.12% |
| 34(C) | 0.66% | 0.31%  | 0.45% | 34(C) | 1.10% | 0.47%  | 0.72% |
| 35(S) | 0.12% | 0.09%  | 0.10% | 35(S) | 0.16% | 0.16%  | 0.16% |
| 36(C) | 0.27% | 0.20%  | 0.24% | 36(C) | 0.48% | 0.26%  | 0.35% |
| 37(C) | 0.45% | 0.06%  | 0.16% | 37(C) | 0.70% | 0.08%  | 0.24% |
| 38(C) | 0.03% | 0.01%  | 0.01% | 38(C) | 0.07% | 0.04%  | 0.05% |
| 39(C) | 0.37% | 0.13%  | 0.21% | 39(C) | 0.64% | 0.15%  | 0.31% |
| 40(C) | 0.08% | -0.02% | 0.00% | 40(C) | 0.15% | -0.01% | 0.00% |
| 41(C) | 0.47% | 0.15%  | 0.26% | 41(C) | 0.77% | 0.18%  | 0.38% |
| 42(O) | 0.12% | 0.02%  | 0.05% | 42(O) | 0.22% | 0.02%  | 0.07% |
| 43(C) | 0.00% | 0.00%  | 0.00% | 43(C) | 0.00% | 0.00%  | 0.00% |
| 45(C) | 4.00% | 6.59%  | 5.13% | 45(C) | 3.55% | 5.79%  | 4.53% |
| 46(C) | 4.51% | 7.46%  | 5.80% | 46(C) | 3.14% | 5.16%  | 4.03% |
| 47(C) | 2.97% | 3.12%  | 3.05% | 47(C) | 3.20% | 3.40%  | 3.30% |
| 48(C) | 1.65% | 2.12%  | 1.87% | 48(C) | 1.38% | 1.73%  | 1.54% |
| 49(C) | 1.21% | 1.14%  | 1.17% | 49(C) | 1.44% | 1.41%  | 1.42% |

|        |        |       |       |        |       |        |       |
|--------|--------|-------|-------|--------|-------|--------|-------|
| 50(C)  | 2.73%  | 4.97% | 3.68% | 50(C)  | 2.57% | 5.13%  | 3.63% |
| 51(C)  | 1.12%  | 0.40% | 0.67% | 51(C)  | 1.35% | 0.46%  | 0.79% |
| 52(C)  | 1.49%  | 3.12% | 2.16% | 52(C)  | 1.23% | 2.89%  | 1.89% |
| 53(N)  | 4.16%  | 0.34% | 1.19% | 53(N)  | 5.32% | 0.31%  | 1.28% |
| 54(C)  | 0.20%  | 0.62% | 0.35% | 54(C)  | 0.26% | 0.94%  | 0.50% |
| 55(C)  | 0.85%  | 0.31% | 0.51% | 55(C)  | 1.05% | 0.39%  | 0.64% |
| 56(C)  | 0.03%  | 0.12% | 0.06% | 56(C)  | 0.04% | 0.20%  | 0.09% |
| 57(C)  | 0.86%  | 0.54% | 0.68% | 57(C)  | 1.10% | 0.81%  | 0.94% |
| 58(C)  | 0.02%  | 0.09% | 0.04% | 58(C)  | 0.02% | 0.17%  | 0.05% |
| 59(C)  | 0.89%  | 0.32% | 0.53% | 59(C)  | 1.14% | 0.41%  | 0.69% |
| 60(C)  | 0.36%  | 0.25% | 0.30% | 60(C)  | 0.44% | 0.26%  | 0.34% |
| 61(C)  | 0.45%  | 0.12% | 0.23% | 61(C)  | 0.56% | 0.13%  | 0.27% |
| 62(C)  | 0.09%  | 0.01% | 0.02% | 62(C)  | 0.12% | -0.04% | 0.00% |
| 63(C)  | 0.46%  | 0.17% | 0.28% | 63(C)  | 0.59% | 0.15%  | 0.29% |
| 64(C)  | 0.06%  | 0.01% | 0.02% | 64(C)  | 0.08% | 0.00%  | 0.00% |
| 65(C)  | 0.63%  | 0.13% | 0.29% | 65(C)  | 0.77% | 0.09%  | 0.26% |
| 66(O)  | 0.19%  | 0.03% | 0.07% | 66(O)  | 0.22% | 0.03%  | 0.08% |
| 67(C)  | 0.00%  | 0.00% | 0.00% | 67(C)  | 0.00% | 0.00%  | 0.00% |
| 69(S)  | 0.09%  | 0.07% | 0.08% | 69(S)  | 0.11% | 0.12%  | 0.12% |
| 114(S) | 0.14%  | 0.03% | 0.06% | 114(S) | 0.24% | 0.43%  | 0.32% |
| 115(O) | 0.10%  | 0.00% | 0.02% | 115(O) | 0.10% | 0.04%  | 0.07% |
| 116(C) | 0.12%  | 0.01% | 0.04% | 116(C) | 0.17% | 0.32%  | 0.23% |
| 117(C) | 0.03%  | 0.00% | 0.01% | 117(C) | 0.04% | 0.06%  | 0.05% |
| 118(C) | 0.01%  | 0.00% | 0.00% | 118(C) | 0.01% | 0.02%  | 0.02% |
| 119(C) | 0.00%  | 0.00% | 0.00% | 119(C) | 0.01% | 0.01%  | 0.01% |
| 120(C) | 0.00%  | 0.00% | 0.00% | 120(C) | 0.00% | 0.00%  | 0.00% |
| 121(C) | 0.00%  | 0.00% | 0.00% | 121(C) | 0.00% | 0.00%  | 0.00% |
| 135(C) | 0.07%  | 0.05% | 0.06% | 135(C) | 0.08% | 0.08%  | 0.08% |
| 136(C) | 0.01%  | 0.00% | 0.00% | 136(C) | 0.01% | 0.00%  | 0.01% |
| 137(C) | 0.00%  | 0.00% | 0.00% | 137(C) | 0.00% | 0.00%  | 0.00% |
| 138(C) | 0.00%  | 0.00% | 0.00% | 138(C) | 0.00% | 0.00%  | 0.00% |
| 139(C) | 0.00%  | 0.00% | 0.00% | 139(C) | 0.00% | 0.00%  | 0.00% |
| 140(C) | 0.00%  | 0.00% | 0.00% | 140(C) | 0.00% | 0.00%  | 0.00% |
| 142(O) | -0.01% | 0.01% | 0.00% | 142(O) | 0.05% | 0.02%  | 0.03% |
| 143(C) | 0.07%  | 0.06% | 0.06% | 143(C) | 0.10% | 0.11%  | 0.11% |
| 144(C) | 0.01%  | 0.01% | 0.01% | 144(C) | 0.02% | 0.02%  | 0.02% |
| 145(C) | 0.00%  | 0.00% | 0.00% | 145(C) | 0.01% | 0.01%  | 0.01% |
| 146(C) | 0.00%  | 0.00% | 0.00% | 146(C) | 0.00% | 0.00%  | 0.00% |
| 147(C) | 0.00%  | 0.00% | 0.00% | 147(C) | 0.00% | 0.00%  | 0.00% |
| 148(C) | 0.00%  | 0.00% | 0.00% | 148(C) | 0.00% | 0.00%  | 0.00% |

|        |       |       |       |        |       |       |       |
|--------|-------|-------|-------|--------|-------|-------|-------|
| 150(O) | 0.11% | 0.01% | 0.04% | 150(O) | 0.10% | 0.02% | 0.05% |
|--------|-------|-------|-------|--------|-------|-------|-------|

Table S10 Contribution of each non-hydrogen atom to hole and electron of ZT4.

| $S_0-S_1$ |        |          |         | $S_0-S_2$ |       |          |         |
|-----------|--------|----------|---------|-----------|-------|----------|---------|
| atom      | hole   | electron | Overlap | atom      | hole  | electron | Overlap |
| 1(C)      | 1.52%  | 3.92%    | 2.44%   | 1(C)      | 1.19% | 2.60%    | 1.76%   |
| 2(C)      | 3.17%  | 0.89%    | 1.68%   | 2(C)      | 1.61% | 0.14%    | 0.48%   |
| 3(C)      | 3.63%  | 7.41%    | 5.19%   | 3(C)      | 2.21% | 2.98%    | 2.57%   |
| 4(C)      | 3.47%  | 2.15%    | 2.73%   | 4(C)      | 1.79% | 0.53%    | 0.97%   |
| 5(C)      | 1.65%  | 2.28%    | 1.94%   | 5(C)      | 1.36% | 1.30%    | 1.33%   |
| 6(C)      | 5.86%  | 4.72%    | 5.26%   | 6(C)      | 3.29% | 1.45%    | 2.19%   |
| 7(N)      | 13.37% | 0.56%    | 2.73%   | 7(N)      | 7.31% | 1.06%    | 2.79%   |
| 8(C)      | 3.05%  | 6.71%    | 4.53%   | 8(C)      | 2.70% | 3.96%    | 3.27%   |
| 9(C)      | 2.93%  | 1.94%    | 2.39%   | 9(C)      | 1.75% | 0.84%    | 1.21%   |
| 10(C)     | 1.42%  | 2.29%    | 1.80%   | 10(C)     | 1.60% | 1.68%    | 1.64%   |
| 11(C)     | 4.95%  | 4.53%    | 4.74%   | 11(C)     | 3.62% | 2.21%    | 2.83%   |
| 12(C)     | 1.15%  | 2.82%    | 1.80%   | 12(C)     | 1.41% | 3.39%    | 2.19%   |
| 13(C)     | 2.99%  | 1.13%    | 1.84%   | 13(C)     | 1.69% | 0.17%    | 0.54%   |
| 14(C)     | 1.00%  | 0.33%    | 0.57%   | 14(C)     | 0.92% | 1.37%    | 1.13%   |
| 15(C)     | 1.92%  | 0.11%    | 0.47%   | 15(C)     | 1.25% | 1.03%    | 1.14%   |
| 16(C)     | 0.23%  | 0.00%    | 0.03%   | 16(C)     | 0.29% | 0.12%    | 0.19%   |
| 17(C)     | 1.46%  | 0.02%    | 0.16%   | 17(C)     | 1.14% | 1.52%    | 1.32%   |
| 18(C)     | 0.23%  | 0.01%    | 0.05%   | 18(C)     | 0.26% | 0.10%    | 0.16%   |
| 19(C)     | 1.49%  | 0.09%    | 0.37%   | 19(C)     | 0.95% | 0.93%    | 0.94%   |
| 20(C)     | 2.61%  | 5.38%    | 3.75%   | 20(C)     | 4.06% | 7.69%    | 5.59%   |
| 21(C)     | 4.46%  | 6.28%    | 5.29%   | 21(C)     | 4.49% | 6.25%    | 5.29%   |
| 22(C)     | 1.64%  | 2.52%    | 2.03%   | 22(C)     | 3.21% | 4.58%    | 3.83%   |
| 23(C)     | 1.20%  | 2.35%    | 1.68%   | 23(C)     | 1.57% | 3.54%    | 2.36%   |
| 24(C)     | 0.59%  | 0.39%    | 0.48%   | 24(C)     | 1.35% | 0.76%    | 1.01%   |
| 25(C)     | 1.98%  | 3.61%    | 2.68%   | 25(C)     | 3.17% | 6.24%    | 4.45%   |
| 26(C)     | 0.62%  | 0.79%    | 0.70%   | 26(C)     | 1.44% | 1.91%    | 1.66%   |
| 27(C)     | 1.32%  | 1.69%    | 1.49%   | 27(C)     | 1.74% | 1.97%    | 1.85%   |
| 28(N)     | 2.14%  | 0.23%    | 0.70%   | 28(N)     | 5.43% | 0.33%    | 1.34%   |
| 29(C)     | 0.11%  | 0.35%    | 0.19%   | 29(C)     | 0.34% | 0.90%    | 0.55%   |
| 30(C)     | 0.40%  | 0.12%    | 0.22%   | 30(C)     | 1.02% | 0.34%    | 0.59%   |
| 31(C)     | 0.01%  | 0.11%    | 0.03%   | 31(C)     | 0.03% | 0.18%    | 0.08%   |
| 32(C)     | 0.34%  | 0.29%    | 0.32%   | 32(C)     | 0.96% | 0.68%    | 0.81%   |
| 33(C)     | 0.02%  | -0.02%   | 0.00%   | 33(C)     | 0.05% | 0.11%    | 0.08%   |

|        |       |       |       |        |       |       |       |
|--------|-------|-------|-------|--------|-------|-------|-------|
| 34(C)  | 0.33% | 0.18% | 0.24% | 34(C)  | 0.90% | 0.36% | 0.57% |
| 35(S)  | 0.04% | 0.03% | 0.04% | 35(S)  | 0.11% | 0.11% | 0.11% |
| 36(C)  | 0.10% | 0.35% | 0.19% | 36(C)  | 0.33% | 0.90% | 0.54% |
| 37(C)  | 0.41% | 0.18% | 0.27% | 37(C)  | 1.04% | 0.48% | 0.70% |
| 38(C)  | 0.01% | 0.06% | 0.02% | 38(C)  | 0.03% | 0.06% | 0.04% |
| 39(C)  | 0.35% | 0.27% | 0.31% | 39(C)  | 0.99% | 0.64% | 0.80% |
| 40(C)  | 0.02% | 0.05% | 0.03% | 40(C)  | 0.05% | 0.22% | 0.11% |
| 41(C)  | 0.34% | 0.14% | 0.22% | 41(C)  | 0.93% | 0.20% | 0.43% |
| 42(S)  | 0.04% | 0.02% | 0.03% | 42(S)  | 0.09% | 0.08% | 0.09% |
| 43(C)  | 3.29% | 6.99% | 4.80% | 43(C)  | 3.44% | 6.62% | 4.77% |
| 44(C)  | 5.51% | 7.56% | 6.45% | 44(C)  | 3.86% | 4.91% | 4.35% |
| 45(C)  | 2.05% | 3.19% | 2.56% | 45(C)  | 2.69% | 4.01% | 3.29% |
| 46(C)  | 1.70% | 2.04% | 1.87% | 46(C)  | 1.50% | 1.52% | 1.51% |
| 47(C)  | 0.75% | 1.07% | 0.90% | 47(C)  | 1.20% | 1.84% | 1.48% |
| 48(C)  | 2.53% | 4.54% | 3.39% | 48(C)  | 2.76% | 5.36% | 3.84% |
| 49(C)  | 0.69% | 0.45% | 0.56% | 49(C)  | 1.09% | 0.55% | 0.78% |
| 50(C)  | 1.57% | 3.10% | 2.20% | 50(C)  | 1.41% | 3.27% | 2.15% |
| 51(N)  | 2.67% | 0.27% | 0.85% | 51(N)  | 4.64% | 0.27% | 1.12% |
| 52(C)  | 0.13% | 0.40% | 0.23% | 52(C)  | 0.26% | 0.69% | 0.42% |
| 53(C)  | 0.42% | 0.24% | 0.32% | 53(C)  | 0.75% | 0.39% | 0.54% |
| 54(C)  | 0.02% | 0.05% | 0.03% | 54(C)  | 0.04% | 0.08% | 0.05% |
| 55(C)  | 0.44% | 0.33% | 0.38% | 55(C)  | 0.79% | 0.55% | 0.66% |
| 56(C)  | 0.01% | 0.10% | 0.03% | 56(C)  | 0.02% | 0.19% | 0.07% |
| 57(C)  | 0.48% | 0.18% | 0.29% | 57(C)  | 0.82% | 0.23% | 0.43% |
| 58(C)  | 0.15% | 0.44% | 0.26% | 58(C)  | 0.30% | 0.78% | 0.48% |
| 59(C)  | 0.46% | 0.14% | 0.26% | 59(C)  | 0.83% | 0.17% | 0.38% |
| 60(C)  | 0.03% | 0.12% | 0.06% | 60(C)  | 0.05% | 0.24% | 0.11% |
| 61(C)  | 0.51% | 0.33% | 0.41% | 61(C)  | 0.92% | 0.50% | 0.68% |
| 62(C)  | 0.02% | 0.03% | 0.02% | 62(C)  | 0.03% | 0.04% | 0.03% |
| 63(C)  | 0.54% | 0.28% | 0.39% | 63(C)  | 0.94% | 0.49% | 0.68% |
| 64(S)  | 0.08% | 0.04% | 0.06% | 64(S)  | 0.13% | 0.07% | 0.10% |
| 65(S)  | 0.04% | 0.03% | 0.04% | 65(S)  | 0.08% | 0.08% | 0.08% |
| 106(C) | 0.03% | 0.02% | 0.03% | 106(C) | 0.06% | 0.05% | 0.05% |
| 107(C) | 0.00% | 0.00% | 0.00% | 107(C) | 0.01% | 0.00% | 0.00% |
| 108(C) | 0.00% | 0.00% | 0.00% | 108(C) | 0.00% | 0.00% | 0.00% |
| 109(C) | 0.00% | 0.00% | 0.00% | 109(C) | 0.00% | 0.00% | 0.00% |
| 110(C) | 0.00% | 0.00% | 0.00% | 110(C) | 0.00% | 0.00% | 0.00% |
| 111(C) | 0.00% | 0.00% | 0.00% | 111(C) | 0.00% | 0.00% | 0.00% |
| 113(O) | 0.00% | 0.01% | 0.00% | 113(O) | 0.01% | 0.01% | 0.01% |
| 114(C) | 0.03% | 0.03% | 0.03% | 114(C) | 0.08% | 0.07% | 0.07% |

|        |       |       |       |        |       |       |       |
|--------|-------|-------|-------|--------|-------|-------|-------|
| 115(C) | 0.01% | 0.00% | 0.00% | 115(C) | 0.02% | 0.01% | 0.01% |
| 116(C) | 0.00% | 0.00% | 0.00% | 116(C) | 0.00% | 0.00% | 0.00% |
| 117(C) | 0.00% | 0.00% | 0.00% | 117(C) | 0.00% | 0.00% | 0.00% |
| 118(C) | 0.00% | 0.00% | 0.00% | 118(C) | 0.00% | 0.00% | 0.00% |
| 119(C) | 0.00% | 0.00% | 0.00% | 119(C) | 0.00% | 0.00% | 0.00% |
| 121(O) | 0.02% | 0.00% | 0.01% | 121(O) | 0.05% | 0.02% | 0.03% |
| 146(C) | 0.03% | 0.03% | 0.03% | 146(C) | 0.08% | 0.07% | 0.08% |
| 147(C) | 0.01% | 0.00% | 0.01% | 147(C) | 0.02% | 0.01% | 0.02% |
| 148(C) | 0.00% | 0.00% | 0.00% | 148(C) | 0.01% | 0.00% | 0.01% |
| 149(C) | 0.00% | 0.00% | 0.00% | 149(C) | 0.00% | 0.00% | 0.00% |
| 150(C) | 0.00% | 0.00% | 0.00% | 150(C) | 0.00% | 0.00% | 0.00% |
| 151(C) | 0.00% | 0.00% | 0.00% | 151(C) | 0.00% | 0.00% | 0.00% |
| 153(O) | 0.01% | 0.00% | 0.00% | 153(O) | 0.03% | 0.00% | 0.01% |
| 154(C) | 0.05% | 0.03% | 0.04% | 154(C) | 0.08% | 0.05% | 0.06% |
| 155(C) | 0.01% | 0.00% | 0.01% | 155(C) | 0.02% | 0.01% | 0.01% |
| 156(C) | 0.00% | 0.00% | 0.00% | 156(C) | 0.01% | 0.00% | 0.00% |
| 157(C) | 0.00% | 0.00% | 0.00% | 157(C) | 0.00% | 0.00% | 0.00% |
| 158(C) | 0.00% | 0.00% | 0.00% | 158(C) | 0.00% | 0.00% | 0.00% |
| 159(C) | 0.00% | 0.00% | 0.00% | 159(C) | 0.00% | 0.00% | 0.00% |
| 161(O) | 0.05% | 0.01% | 0.02% | 161(O) | 0.09% | 0.01% | 0.03% |
| 186(O) | 0.58% | 0.01% | 0.06% | 186(O) | 0.60% | 0.24% | 0.38% |
| 187(C) | 0.00% | 0.00% | 0.00% | 187(C) | 0.00% | 0.00% | 0.00% |

Table S11 The electronic coupling ( $V$ , eV)/transfer integral ( $v$ , eV) and hole mobility ( $\mu$ ,  $\text{cm}^2 \text{V}^{-1} \text{s}^{-1}$ ) at different method

| Compounds | Pathways       | electronic coupling<br>( $V$ , eV) | $\mu_1$               | transfer integral<br>( $v$ , eV) | $\mu_2$ |
|-----------|----------------|------------------------------------|-----------------------|----------------------------------|---------|
| Z34       | T <sub>1</sub> | $3.62 \times 10^{-6}$              | $1.36 \times 10^{-4}$ | $5.44 \times 10^{-3}$            | 0.115   |
|           | T <sub>2</sub> | 0                                  |                       | $9.52 \times 10^{-3}$            |         |
|           | T <sub>3</sub> | $3.17 \times 10^{-4}$              |                       | $2.99 \times 10^{-2}$            |         |
|           | T <sub>4</sub> | 0                                  |                       | $3.13 \times 10^{-3}$            |         |

Table S12 The electronic coupling ( $V$ , eV) and hole mobility ( $\mu$ ,  $\text{cm}^2 \text{V}^{-1} \text{s}^{-1}$ ) of the Z34 molecules on PW91/6-31G\*\* and PBE0/6-31G\*\* method.

| Compounds | Pathways       | $V$<br>(eV)           | $\Phi$ | $\mu$<br>( $\text{cm}^2 \text{V}^{-1} \text{s}^{-1}$ )         |
|-----------|----------------|-----------------------|--------|----------------------------------------------------------------|
| PBE0      | T <sub>1</sub> | $3.62 \times 10^{-6}$ | 115°   | $7.6 \times 10^{-4}$ ( <i>Expt.</i> )<br>$1.36 \times 10^{-4}$ |
|           | T <sub>2</sub> | 0                     |        |                                                                |
|           | T <sub>3</sub> | $3.17 \times 10^{-4}$ |        |                                                                |
|           | T <sub>4</sub> | 0                     |        |                                                                |
| PW91      | T <sub>1</sub> | $3.47 \times 10^{-6}$ | 115°   | $1.35 \times 10^{-4}$                                          |
|           | T <sub>2</sub> | 0                     |        |                                                                |
|           | T <sub>3</sub> | $3.16 \times 10^{-4}$ |        |                                                                |
|           | T <sub>4</sub> | 0                     |        |                                                                |

Table S13 The optimized configurations of ZT-based HTMs adsorbed on the  $\text{PbI}_2$ -terminated perovskite surface, together with the corresponding adsorption energy (Kcal/mol) and O··Pb distances(Å) of Z34, ZT1, ZT2, ZT3 and ZT4.

| Molecules | adsorption energy<br>(Kcal/mol) | O··Pb distances 1<br>(Å) | O··Pb distances 2<br>(Å) |
|-----------|---------------------------------|--------------------------|--------------------------|
| Z34       | -53.482                         | 4.200                    | 3.909                    |
| ZT1       | -51.322                         | 5.417                    | 4.748                    |
| ZT2       | -57.506                         | 3.949                    | 4.501                    |
| ZT3       | -63.753                         | 4.589                    | 4.678                    |
| ZT4       | -50.610                         | 3.965                    | 4.329                    |



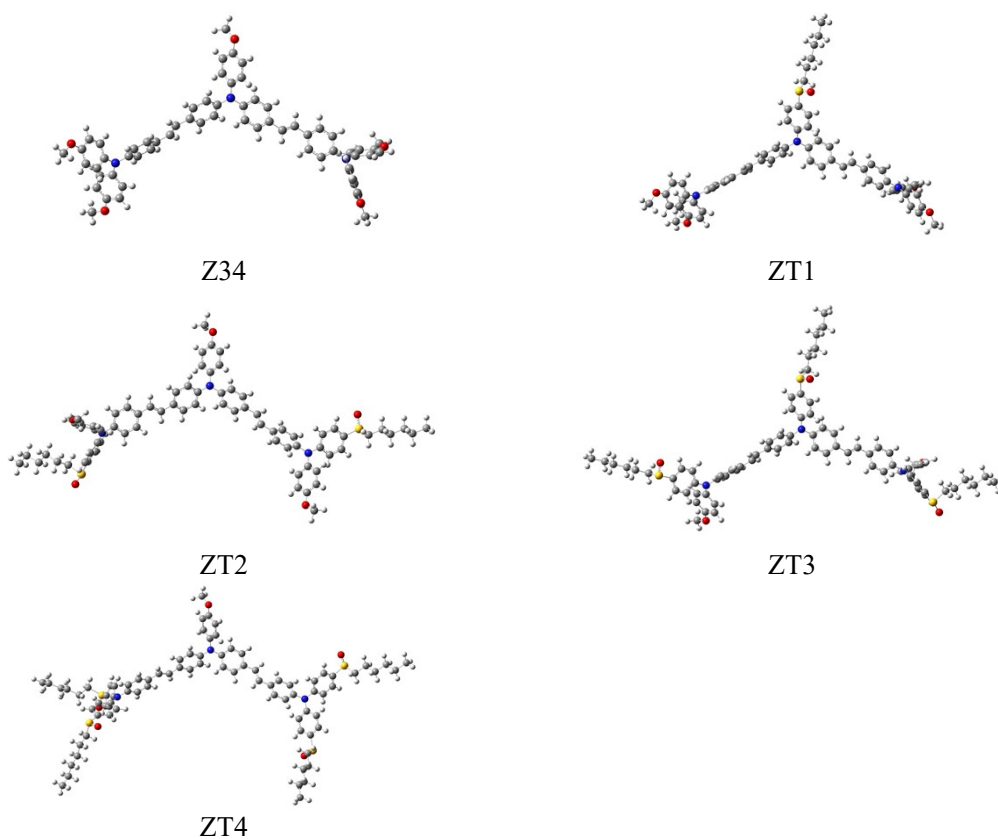

Fig. S1 The optimized geometries of the investigated molecules at the BMK/6-31G\*\* level.

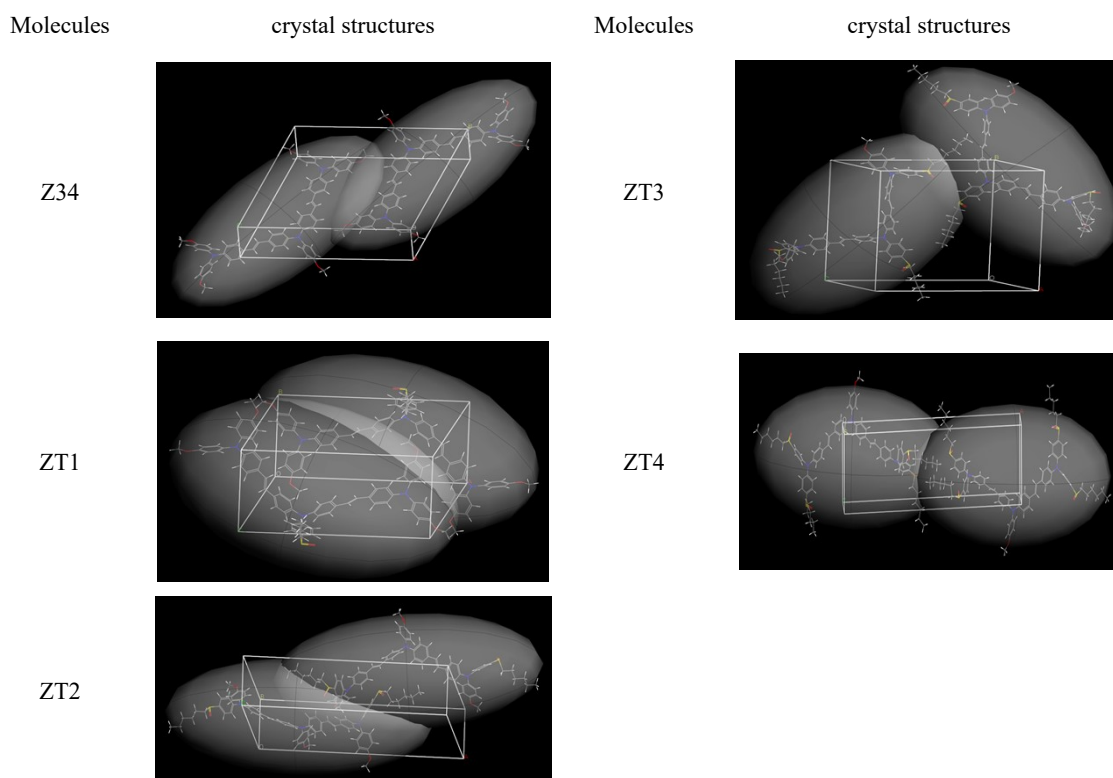

Fig. S2 Calculated crystal structures with the lowest total energies of the investigated molecules.

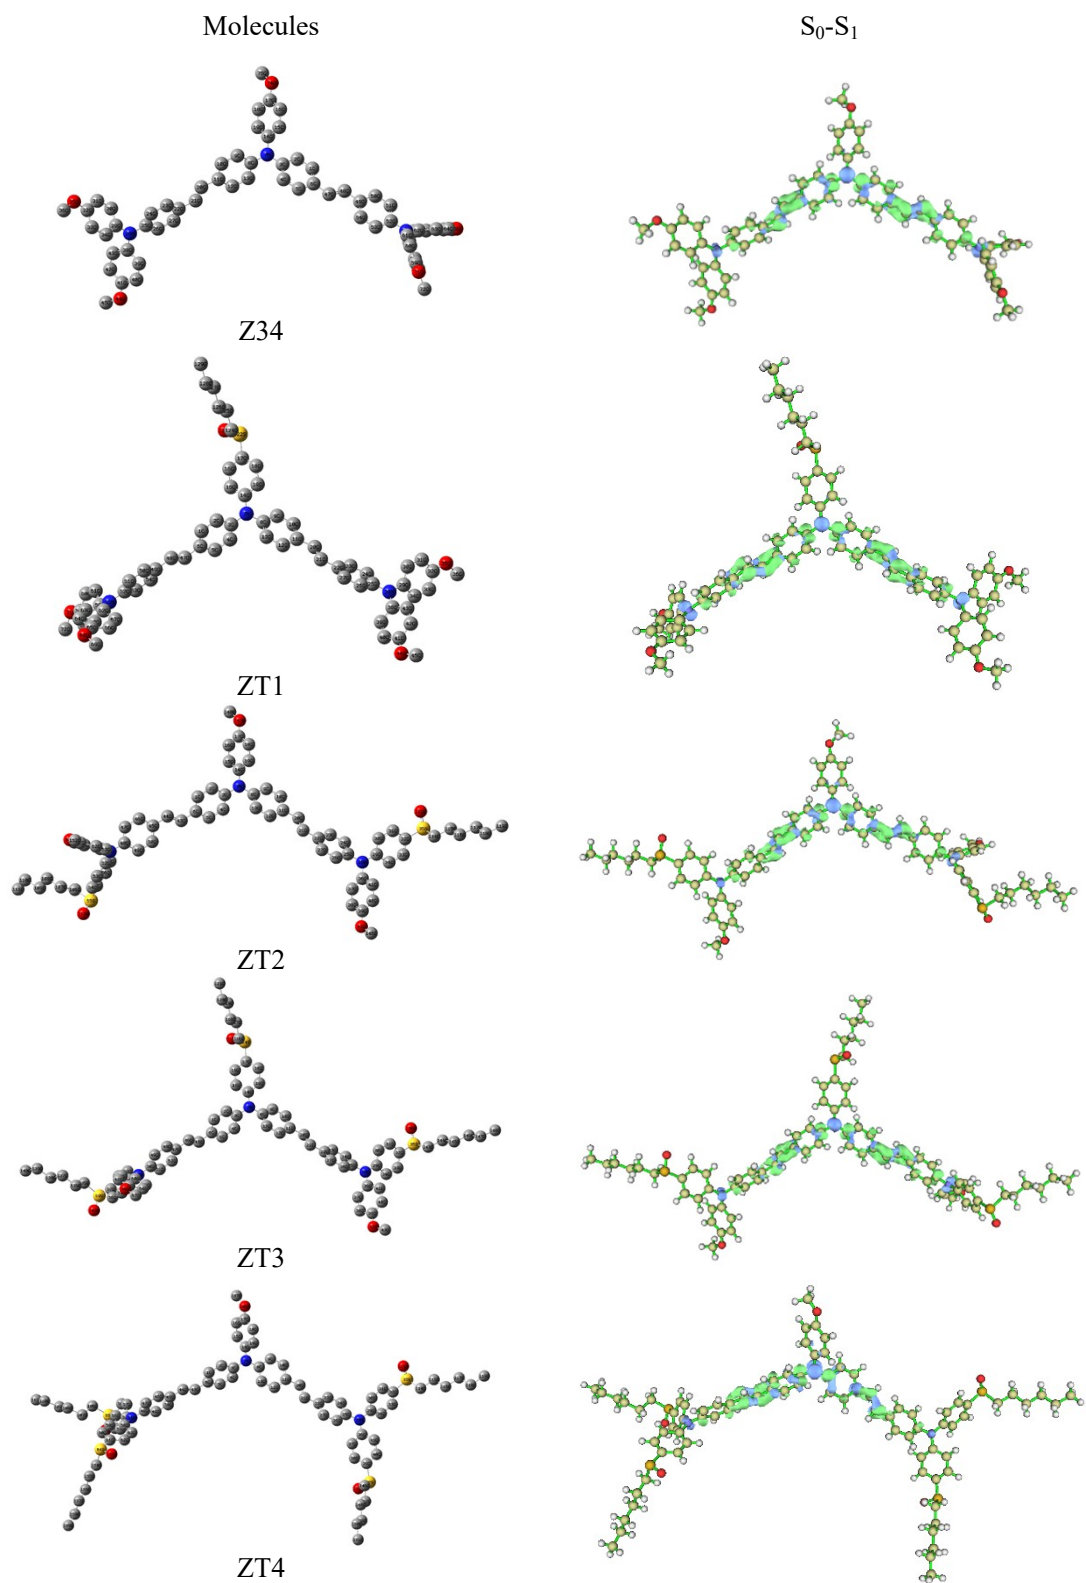

Fig.S3 The isosurface of hole and electron distribution simultaneously of Z34, ZT1, ZT2, ZT3 and ZT4, blue and green isosurfaces represent hole and electron distributions, respectively.

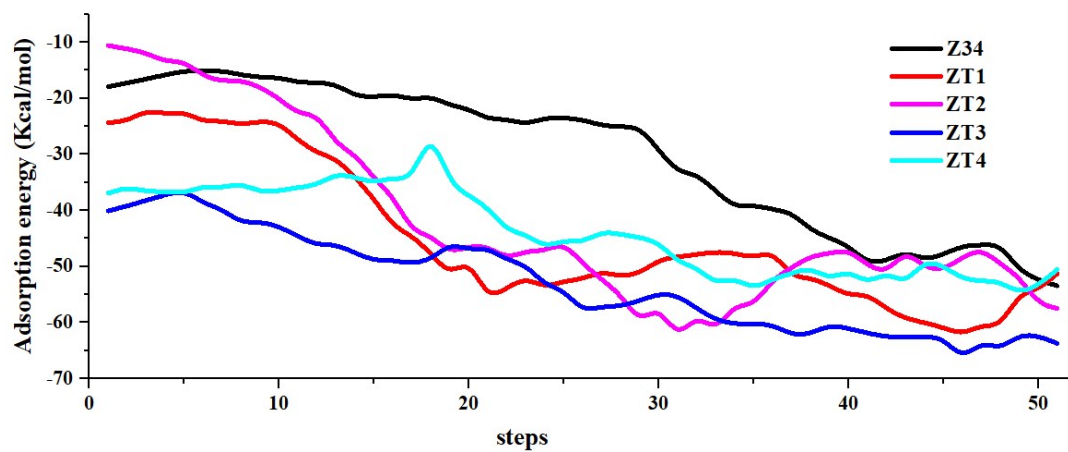

Fig. S4 The molecular dynamics (MD) simulations of ZT-based HTMs adsorbed on the  $\text{PbI}_2$ -terminated perovskite surface under the isothermal and isochoric ensemble (NVT) for 50 ps with a time step of 1 fs.
